# Supplementary material for: Grounding line migration through the calving season at Jakobshavn Isbræ, Greenland, observed with terrestrial radar interferometry
Source: Copernicus journal article supplement (doi:10.5194/tc-12-1387-2018), 2018-04-17
Supplement: Supplementary file [file tc-12-1387-2018-supplement-title-page.pdf › tc-12-1387-2018-supplement-title-page.pdf]

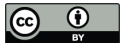

## *Supplement of*

# **Grounding line migration through the calving season at Jakobshavn Isbræ, Greenland, observed with terrestrial radar interferometry**

**Surui Xie et al.**

*Correspondence to:* Surui Xie ([suruixie@mail.usf.edu](mailto:suruixie@mail.usf.edu))

- [tc-12-1387-2018-supplement-title-page.pdf](#)
- [Supplement\\_Xie\\_et\\_al\\_2018.pdf](#)
- [suppl](#)
  - [movS1\\_2012.mp4](#)
  - [movS2\\_2015.mp4](#)
  - [movS3\\_2016.mp4](#)

The copyright of individual parts of the supplement might differ from the CC BY 4.0 License.
